# Supplementary material
Source: HighWire-hosted journal article supplement (https://www.jrheum.org/highwire/filestream/39071/field_highwire_adjunct_files/0/200688DataSuppl.pdf)
Supplement: 200688DataSuppl.pdf [file 200688DataSuppl.pdf]

## ONLINE SUPPLEMENTARY MATERIAL

**Supplementary Methods:** Exclusion criteria applied during initial evaluation of performance measures (PMs) during consideration for inclusion in the candidate set reviewed by the Delphi panelists

1. PM specific to physiotherapy
2. PM specific to a nurse-led model of care
3. PM doesn't meet Canadian benchmarks
4. PM specific to centralized intake processes
5. PM too complex
6. PM doesn't align with Canadian guidelines
7. PM was supplanted by newer ACR Quality Measure
8. PM excluded in favour of a similar AAC System-Level Performance Measure
9. PM less clearly defined than in a similar, included measure
10. PM represents a low-priority concept
11. PM addresses a concept covered in a similar measure already included
